# Supplementary material for: The Alzheimer's Disease-Associated Amyloid β-Protein Is an Antimicrobial Peptide
Source: PubMed Central journal article supplement (PMC2831066; doi:10.1371/journal.pone.0009505), 2010-03-03
Supplement: pone.0009505.s002.pdf [file pone.0009505.s002.pdf]

| <b>Organism</b>                 | <b>Gram Stain</b> | <b>ATCC No.</b> | <b>Growth Media</b> | <b>Incub. (hrs)</b> |
|---------------------------------|-------------------|-----------------|---------------------|---------------------|
| <i>Staphylococcus aureus</i>    | +                 | 25923           | MHB                 | 12                  |
| <i>Escherichia coli</i>         | -                 | 25922           | BHIB                | 12                  |
| <i>Listeria monocytogenes</i>   | +                 | 19112           | BHIB                | 18                  |
| <i>Pseudomonas aeruginosa</i>   | -                 | 27853           | BHIB                | 18                  |
| <i>Enterococcus faecalis</i>    | +                 | 29212           | BHIB                | 18                  |
| <i>Staphylococcus epidermis</i> | +                 | 12228           | BHIB                | 18                  |
| <i>Streptococcus agalactiae</i> | +                 | 12386           | BHIB/LHB            | 12                  |
| <i>Streptococcus pneumoniae</i> | +                 | 49619           | BHIB/LHB            | 12                  |
| <i>Streptococcus mitis</i>      | +                 | 6249            | BHIB/LHB            | 12                  |
| <i>Streptococcus pyogenes</i>   | +                 | 19615           | BHIB/LHB            | 18                  |
| <i>Streptococcus salivarius</i> | +                 | 13419           | BHIB/LHB            | 12                  |
| <i>Candida albicans</i>         |                   | 10231           | RPMI-1640           | 18                  |
